# Supplementary material for: Predictability of drug-induced liver injury by machine learning
Source: Biol Direct. 2020 Feb 13;15:3. doi: 10.1186/s13062-020-0259-4 (PMC7020573; doi:10.1186/s13062-020-0259-4)
Supplement: Supplementary file 1 — Additional file 1 CAMDA filenames. The spreadsheet provided by the CAMDA2018 conference organizers. It contains the names of the files included in the CMap Drug Safety challenge, as well as the binary DILI label for each compound and the split into TR and TS sets. [file 13062_2020_259_MOESM1_ESM.xlsx]

## Sheet: Sheet1
* instances generated with HT_HG-U133A or HT_HG-U133A use five or six vehicle scans; the identifiers for these are constructed by appending each of the six extensions (eg ".H01") in this field to the twenty-two character number preceding the period (ie ".") from the corresponding perturbation_scan_id
			MCF7		PC3
S No.	Data Type	Class Label	Compound .cel file name	Vehicle .cel file name *	Compound .cel file name	Vehicle .cel file name *
1	Training	1	5500024030403071907255.C05	.H01.E03.D04.B05.A06	5500024031723100807775.C05	.H01.G02.E03.D04.B05.A06
2	Training	1	5500024030403071907253.A09	.H07.G08.E09.D10.B11.A12	5500024031723100807771.A09	.H07.G08.E09.D10.B11.A12
3	Training	0	5500024030402071707279.B01	.H01.G02.E03.D04.B05.A06	5500024031723100807776.B01	.H01.G02.E03.D04.B05.A06
4	Training	1	5500024030403071907257.G04	.G02.E03.D04.B05.A06	5500024030700072107992.G04	.H01.E03.D04.B05.A06
5	Training	0	'5500024037496121008324.E08	.H07.G08.E09.D10.B11.A12	'5500024037498121108438.E02	.H01.G02.E03.D04.B05.A06
6	Training	0	5500024032848101507997.F03	.H01.E03.D04.B05.A06	5500024035736031208613.F03	.H01.E03.D04.B05.A06
7	Training	1	5500024030402071707277.F10	.H07.G08.E09.D10.B11.A12	5500024031723100807771.F10	.H07.G08.E09.D10.B11.A12
8	Training	1	5500024024213121906562.B07	.H07.G08.E09.D10.B11.A12	5500024024213121906564.B01	.H01.G02.E03.D04.B05.A06
9	Training	1	5500024032848101507997.H04	.H01.E03.D04.B05.A06	5500024035736031208613.H04	.H01.E03.D04.B05.A06
10	Training	1	5500024032848101507997.D01	.H01.E03.D04.B05.A06	5500024035736031208613.D01	.H01.E03.D04.B05.A06
11	Training	0	5500024030402071707279.H02	.H01.G02.E03.D04.B05.A06	5500024031723100807776.H02	.H01.G02.E03.D04.B05.A06
12	Training	0	'5500024030403071907252.E04	.H01.G02.E03.D04.B05.A06	'5500024034290101707044.E10	.H07.G08.E09.D10.B11.A12
13	Training	1	5500024024211121606513.D09	.H07.G08.E09.D10.B11.A12	5500024031723100807771.D09	.H07.G08.E09.D10.B11.A12
14	Training	1	5500024024211121606513.C12	.H07.G08.E09.D10.B11.A12	5500024035736031208613.C06	.H01.E03.D04.B05.A06
15	Training	1	5500024030403071907255.C09	.H07.G08.E09.D10.B11.A12	5500024031723100807775.C09	.H07.G08.E09.D10.B11.A12
16	Training	1	5500024024213121906562.F07	.H07.G08.E09.D10.B11.A12	5500024024213121906564.F01	.H01.G02.E03.D04.B05.A06
17	Training	0	5500024030402071707277.A10	.H07.G08.E09.D10.B11.A12	5500024031723100807771.A10	.H07.G08.E09.D10.B11.A12
18	Training	0	5500024030402071707277.F11	.H07.G08.E09.D10.B11.A12	5500024031723100807771.F05	.H01.G02.E03.D04.B05.A06
19	Training	1	5500024024211121606513.H10	.H07.G08.E09.D10.B11.A12	5500024031723100807771.H04	.H01.G02.E03.D04.B05.A06
20	Training	0	5500024030700072107988.G09	.H07.G08.E09.D10.B11.A12	5500024035736031208613.G09	.H07.G08.E09.D10.B11.A12
21	Training	1	'5500024030700072107994.E04	.H01.E03.D04.B05.A06	'5500024034290101707046.E10	.H07.G08.E09.D10.B11.A12
22	Training	1	5500024024213121906562.F11	.H07.G08.E09.D10.B11.A12	5500024024213121906564.F05	.H01.G02.E03.D04.B05.A06
23	Training	0	5500024035101021908499.D02	.H01.E03.D04.B05.A06	5500024037498121108440.D08	.H07.G08.E09.D10.B11.A12
24	Training	1	5500024030403071907255.D01	.H01.E03.D04.B05.A06	5500024031723100807775.D01	.H01.G02.E03.D04.B05.A06
25	Training	1	5500024028849050407169.D03	.H01.G02.E03.D04.B05.A06	5500024030700072107986.D03	.H01.G02.E03.D04.B05.A06
26	Training	1	5500024035736031208618.D09	.H07.G08.E09.D10.B11.A12	5500024034290101707046.D09	.H07.G08.E09.D10.B11.A12
27	Training	1	EC2004030515AA	EC2004030514AA	EC2004070116AA	EC2004070114AA
28	Training	1	5500024030760072207031.H08	.H07.G08.E09.D10.B11.A12	5500024030700072107991.H08	.H07.G08.E09.D10.B11.A12
29	Training	0	5500024034290101707045.H06	.H01.G02.E03.D04.B05.A06	5500024024213121906564.H06	.H01.G02.E03.D04.B05.A06
30	Training	1	5500024030700072107988.G12	.H07.G08.E09.D10.B11.A12	5500024037498121108438.G06	.H01.G02.E03.D04.B05.A06
31	Training	1	5500024034290101707045.C06	.H01.G02.E03.D04.B05.A06	5500024031330081907229.C06	.H01.E03.D04.B05.A06
32	Training	1	5500024030403071907257.H09	.H07.G08.E09.D10.B11.A12	5500024030700072107992.H09	.H07.G08.D10.B11.A12
33	Training	1	5500024030760072207031.B09	.H07.G08.E09.D10.B11.A12	5500024030700072107991.B09	.H07.G08.E09.D10.B11.A12
34	Training	1	5500024024214122006606.F01	.H01.G02.E03.D04.B05.A06	5500024024213121906561.F01	.H01.G02.E03.D04.B05.A06
35	Training	1	'5500024030700072107994.E06	.H01.E03.D04.B05.A06	'5500024031723100807773.E12	.H07.G08.E09.D10.B11.A12
36	Training	1	5500024030700072107994.H05	.H01.E03.D04.B05.A06	5500024034290101707046.H05	.H01.G02.E03.D04.B05.A06
37	Training	1	5500024024213121906562.C01	.H01.G02.E03.D04.B05.A06	5500024017802120306174.C07	.H07.G08.E09.D10.B11.A12
38	Training	1	5500024031330081907228.C08	.H07.G08.E09.D10.B11.A12	5500024030760072207026.C08	.H07.G08.E09.D10.B11.A12
39	Training	1	'5500024030402071707279.E07	.H07.G08.E09.D10.B11.A12	'5500024031723100807776.E07	.H07.G08.E09.D10.B11.A12
40	Training	1	5500024035101021908499.F08	.H07.G08.E09.D10.B11.A12	5500024031723100807773.F08	.H07.G08.E09.D10.B11.A12
41	Training	1	5500024024211121606513.B08	.H07.G08.E09.D10.B11.A12	610611110806.B08	.H07.G08.E09.D10.B11.A12
42	Training	0	5500024053146032309538.C05	5500024053146032309538.C01	5500024053146032309538.C11	5500024053146032309538.C07
43	Training	0	5500024024213121906562.F08	.H07.G08.E09.D10.B11.A12	5500024024213121906564.F02	.H01.G02.E03.D04.B05.A06
44	Training	0	'5500024028416032807794.E10	.H07.G08.E09.D10.B11	'5500024035736031208613.E04	.H01.E03.D04.B05.A06
45	Training	1	EC2004012211AA	EC2004012208AA	EC2004060209AA	EC2004060208AA
46	Training	1	5500024030403071907255.D12	.H07.G08.E09.D10.B11.A12	5500024031723100807775.D12	.H07.G08.E09.D10.B11.A12
47	Training	1	5500024024211121606513.C02	.H01.G02.E03.D04.B05.A06	610611110806.C02	.H01.G02.E03.D04.B05.A06
48	Training	0	5500024030402071707277.H08	.H07.G08.E09.D10.B11.A12	5500024031723100807776.H08	.H07.G08.E09.D10.B11.A12
49	Training	0	5500024024214122006606.B04	.H01.G02.E03.D04.B05.A06	5500024024213121906561.B04	.H01.G02.E03.D04.B05.A06
50	Training	1	5500024024211121606513.C08	.H07.G08.E09.D10.B11.A12	610611110806.C08	.H07.G08.E09.D10.B11.A12
51	Training	0	5500024032848101507997.C10	.G08.E09.D10.B11.A12	5500024035736031208613.C10	.H07.G08.E09.D10.B11.A12
52	Training	0	5500024024213121906562.A09	.H07.G08.E09.D10.B11.A12	5500024024213121906564.A03	.H01.G02.E03.D04.B05.A06
53	Training	1	5500024037289120508304.A07	.H07.E09.D10.B11.A12	5500024037498121108438.A01	.H01.G02.E03.D04.B05.A06
54	Training	0	5500024032848101507997.H05	.H01.E03.D04.B05.A06	5500024035736031208613.H05	.H01.E03.D04.B05.A06
55	Training	1	5500024051859013109328.F04	.H01.G02.E03.D04.B05.A06	5500024035736031208613.F10	.H07.G08.E09.D10.B11.A12
56	Training	1	5500024030402071707277.G11	.H07.G08.E09.D10.B11.A12	5500024031723100807771.G05	.H01.G02.E03.D04.B05.A06
57	Training	1	5500024037498121108437.B04	.H01.E03.D04.B05.A06	5500024034290101707044.B04	.H01.G02.E03.D04.B05.A06
58	Training	0	5500024024211121606513.F01	.H01.G02.E03.D04.B05.A06	5500024030760072207026.F07	.H07.G08.E09.D10.B11.A12
59	Training	0	5500024034290101707050.C02	.H01.E03.D04.B05.A06	5500024031723100807771.C02	.H01.G02.E03.D04.B05.A06
60	Training	0	5500024030402071707279.D08	.H07.G08.E09.D10.B11.A12	5500024031723100807776.D08	.H07.G08.E09.D10.B11.A12
61	Training	1	5500024030402071707279.G07	.H07.G08.E09.D10.B11.A12	610611110806.G07	.H07.G08.E09.D10.B11.A12
62	Training	1	5500024028416032807794.B12	.H07.G08.E09.D10.B11	5500024031723100807776.B06	.H01.G02.E03.D04.B05.A06
63	Training	1	5500024031723100807770.B08	.H07.G08.E09.D10.B11.A12	5500024031723100807769.B08	.H07.G08.E09.D10.B11.A12
64	Training	0	5500024031723100807770.H10	.H07.G08.E09.D10.B11.A12	5500024031723100807769.H10	.H07.G08.E09.D10.B11.A12
65	Training	1	5500024037289120508304.H11	.H07.E09.D10.B11.A12	5500024037498121108438.H05	.H01.G02.E03.D04.B05.A06
66	Training	1	5500024030403071907255.A10	.H07.G08.E09.D10.B11.A12	5500024031723100807775.A10	.H07.G08.E09.D10.B11.A12
67	Training	1	5500024030403071907251.G12	.H07.G08.E09.D10.B11.A12	5500024030700072107986.G12	.H07.G08.E09.D10.B11.A12
68	Training	1	5500024030700072107994.F05	.H01.E03.D04.B05.A06	5500024034290101707046.F05	.H01.G02.E03.D04.B05.A06
69	Training	0	5500024032848101507997.H10	.G08.E09.D10.B11.A12	5500024035736031208613.H10	.H07.G08.E09.D10.B11.A12
70	Training	1	5500024028849050407169.F06	.H01.G02.E03.D04.B05.A06	5500024030700072107991.F06	.H01.G02.E03.D04.B05.A06
71	Training	0	5500024024213121906558.A03	.H01.G02.E03.B05.A06	5500024030700072107991.A03	.H01.G02.E03.D04.B05.A06
72	Training	1	5500024030402071707279.B08	.H07.G08.E09.D10.B11.A12	5500024031723100807776.B08	.H07.G08.E09.D10.B11.A12
73	Training	1	'5500024030760072207031.E07	.H07.G08.E09.D10.B11.A12	'5500024030700072107991.E07	.H07.G08.E09.D10.B11.A12
74	Training	0	5500024030403071907252.A05	.H01.G02.E03.D04.B05.A06	5500024034290101707044.A05	.H01.G02.E03.D04.B05.A06
75	Training	1	5500024028849050407169.C09	.G08.E09.D10.B11.A12	5500024034290101707044.C09	.H07.G08.E09.D10.B11.A12
76	Training	1	5500024024214122006606.C07	.H07.G08.E09.D10.B11.A12	5500024024213121906561.C07	.H07.G08.E09.D10.B11.A12
77	Training	1	'5500024037289120508304.E07	.H07.E09.D10.B11.A12	'5500024037498121108438.E01	.H01.G02.E03.D04.B05.A06
78	Training	1	5500024030700072107994.H02	.H01.E03.D04.B05.A06	5500024034290101707044.H08	.H07.G08.E09.D10.B11.A12
79	Training	1	5500024030403071907255.H11	.H07.G08.E09.D10.B11.A12	5500024031723100807775.H11	.H07.G08.E09.D10.B11.A12
80	Training	1	5500024031723100807772.H03	.H01.G02.E03.D04.B05.A06	5500024037498121108442.H09	.H07.G08.D10.B11.A12
81	Training	1	5500024024211121606513.B09	.H07.G08.E09.D10.B11.A12	5500024031723100807771.B09	.H07.G08.E09.D10.B11.A12
82	Training	1	5500024030403071907255.D05	.H01.E03.D04.B05.A06	5500024031723100807775.D05	.H01.G02.E03.D04.B05.A06
83	Training	0	5500024030402071707279.H03	.H01.G02.E03.D04.B05.A06	5500024031723100807776.H03	.H01.G02.E03.D04.B05.A06
84	Training	1	5500024035735011708571.A11	.H07.G08.E09.D10.B11.A12	5500024034290101707046.A11	.H07.G08.E09.D10.B11.A12
85	Training	1	EC2004041404AA	EC2004041402AA	EC2004070117AA	EC2004070114AA
86	Training	1	'5500024024213121906562.E07	.H07.G08.E09.D10.B11.A12	'5500024024213121906564.E01	.H01.G02.E03.D04.B05.A06
87	Training	1	5500024024214122006606.A08	.H07.G08.E09.D10.B11.A12	5500024024213121906561.A08	.H07.G08.E09.D10.B11.A12
88	Training	1	5500024053146032309538.F02	5500024053146032309538.F01	5500024053146032309538.F08	5500024053146032309538.F07
89	Training	1	5500024037498121108437.A01	.H01.E03.D04.B05.A06	5500024034290101707044.A01	.H01.G02.E03.D04.B05.A06
90	Training	1	5500024051859013109328.B06	.H01.G02.E03.D04.B05.A06	5500024037498121108438.B12	.H07.G08.E09.D10.B11.A12
91	Training	0	5500024024211121606513.D02	.H01.G02.E03.D04.B05.A06	5500024030760072207026.D02	.H01.G02.E03.D04.A06
92	Training	0	5500024030700072107994.D09	.H07.G08.E09.D10.B11.A12	5500024031723100807771.D03	.H01.G02.E03.D04.B05.A06
93	Training	1	5500024030403071907251.D11	.H07.G08.E09.D10.B11.A12	5500024030700072107986.D11	.H07.G08.E09.D10.B11.A12
94	Training	1	5500024030700072107994.H06	.H01.E03.D04.B05.A06	5500024031723100807773.H12	.H07.G08.E09.D10.B11.A12
95	Training	1	5500024035735011708567.C02	.H01.G02.E03.D04.B05.A06	5500024037498121108438.C08	.H07.G08.E09.D10.B11.A12
96	Training	1	5500024031330081907228.F12	.H07.G08.E09.D10.B11.A12	5500024030760072207026.F12	.H07.G08.E09.D10.B11.A12
97	Training	0	5500024031723100807770.B12	.H07.G08.E09.D10.B11.A12	5500024031723100807769.B12	.H07.G08.E09.D10.B11.A12
98	Training	1	5500024038291011509600.A06	5500024038291011509600.A01	5500024038291011509600.A12	5500024038291011509600.A07
99	Training	0	5500024024211121606513.C09	.H07.G08.E09.D10.B11.A12	5500024031723100807771.C09	.H07.G08.E09.D10.B11.A12
100	Training	1	5500024024213121906558.G05	.H01.G02.E03.B05.A06	5500024030700072107986.G05	.H01.G02.E03.D04.B05.A06
101	Training	0	5500024037289120508304.D09	.H07.E09.D10.B11.A12	5500024037498121108438.D03	.H01.G02.E03.D04.B05.A06
102	Training	1	5500024024214122006606.H03	.H01.G02.E03.D04.B05.A06	5500024024213121906561.H03	.H01.G02.E03.D04.B05.A06
103	Training	1	5500024030403071907257.B03	.G02.E03.D04.B05.A06	5500024030700072107992.B03	.H01.E03.D04.B05.A06
104	Training	1	EC2004012212AA	EC2004012208AA	EC2005030717AA	EC2005030714AA
105	Training	1	'5500024028849050407172.E12	.H07.G08.E09.D10.B11.A12	'5500024034290101707044.E06	.H01.G02.E03.D04.B05.A06
106	Training	1	5500024028849050407169.C11	.G08.E09.D10.B11.A12	5500024034290101707046.C11	.H07.G08.E09.D10.B11.A12
107	Training	1	'5500024030403071907255.E12	.H07.G08.E09.D10.B11.A12	'5500024031723100807775.E12	.H07.G08.E09.D10.B11.A12
108	Training	1	5500024030403071907253.B08	.H07.G08.E09.D10.B11.A12	5500024031723100807771.B08	.H07.G08.E09.D10.B11.A12
109	Training	1	5500024030403071907251.D09	.H07.G08.E09.D10.B11.A12	5500024030700072107986.D09	.H07.G08.E09.D10.B11.A12
110	Training	1	5500024035736031208618.A11	.H07.G08.E09.D10.B11.A12	5500024031723100807773.A11	.H07.G08.E09.D10.B11.A12
111	Training	1	5500024030403071907257.A04	.G02.E03.D04.B05.A06	5500024030700072107992.A04	.H01.E03.D04.B05.A06
112	Training	0	5500024034290101707050.H06	.H01.E03.D04.B05.A06	5500024031723100807771.H06	.H01.G02.E03.D04.B05.A06
113	Training	1	5500024030760072207031.B04	.H01.G02.E03.D04.A06	5500024030700072107991.B04	.H01.G02.E03.D04.B05.A06
114	Training	0	5500024024214122006606.A05	.H01.G02.E03.D04.B05.A06	5500024024213121906561.A05	.H01.G02.E03.D04.B05.A06
115	Training	1	5500024034290101707045.B03	.H01.G02.E03.D04.B05.A06	5500024031330081907229.B03	.H01.E03.D04.B05.A06
116	Training	0	5500024031330081907228.B02	.H01.G02.E03.D04.B05.A06	5500024030760072207026.B02	.H01.G02.E03.D04.A06
117	Training	1	5500024037289120508304.F10	.H07.E09.D10.B11.A12	5500024037498121108438.F04	.H01.G02.E03.D04.B05.A06
118	Training	0	'5500024024214122006606.E01	.H01.G02.E03.D04.B05.A06	'5500024034290101707044.E01	.H01.G02.E03.D04.B05.A06
119	Training	0	5500024024211121606513.H09	.H07.G08.E09.D10.B11.A12	5500024031723100807771.H09	.H07.G08.E09.D10.B11.A12
120	Training	1	5500024032848101507997.A07	.G08.E09.D10.B11.A12	5500024035736031208613.A07	.H07.G08.E09.D10.B11.A12
121	Training	0	'5500024024214122006606.E06	.H01.G02.E03.D04.B05.A06	'5500024024213121906561.E06	.H01.G02.E03.D04.B05.A06
122	Training	1	5500024030760072207031.H10	.H07.G08.E09.D10.B11.A12	5500024030700072107991.H10	.H07.G08.E09.D10.B11.A12
123	Training	1	5500024024213121906562.D09	.H07.G08.E09.D10.B11.A12	5500024024213121906564.D03	.H01.G02.E03.D04.B05.A06
124	Training	1	5500024024214122006606.D11	.H07.G08.E09.D10.B11.A12	5500024024213121906561.D11	.H07.G08.E09.D10.B11.A12
125	Training	1	5500024037498121108437.F12	.H07.G08.E09.D10.B11.A12	5500024034290101707044.F12	.H07.G08.E09.D10.B11.A12
126	Training	0	5500024031330081907228.A04	.H01.G02.E03.D04.B05.A06	5500024030760072207026.A04	.H01.G02.E03.D04.A06
127	Training	0	5500024031330081907228.D09	.H07.G08.E09.D10.B11.A12	5500024030760072207026.D09	.H07.G08.E09.D10.B11.A12
128	Training	1	5500024030760072207031.G10	.H07.G08.E09.D10.B11.A12	5500024030700072107991.G10	.H07.G08.E09.D10.B11.A12
129	Training	0	5500024035101021908499.G01	.H01.E03.D04.B05.A06	5500024037498121108440.G07	.H07.G08.E09.D10.B11.A12
130	Training	1	5500024030402071707279.A02	.H01.G02.E03.D04.B05.A06	5500024031723100807776.A02	.H01.G02.E03.D04.B05.A06
131	Training	1	5500024035735011708571.H12	.H07.G08.E09.D10.B11.A12	5500024034290101707046.H12	.H07.G08.E09.D10.B11.A12
132	Training	0	5500024031723100807770.B10	.H07.G08.E09.D10.B11.A12	5500024031723100807769.B10	.H07.G08.E09.D10.B11.A12
133	Training	1	5500024031723100807770.F08	.H07.G08.E09.D10.B11.A12	5500024031723100807769.F08	.H07.G08.E09.D10.B11.A12
134	Training	1	5500024034290101707050.B04	.H01.E03.D04.B05.A06	5500024031723100807771.B04	.H01.G02.E03.D04.B05.A06
135	Training	1	5500024031723100807770.F06	.H01.G02.D04.B05.A06	5500024031723100807769.F06	.H01.G02.E03.D04.B05.A06
136	Training	0	5500024030403071907253.G11	.H07.G08.E09.D10.B11.A12	5500024031723100807771.G11	.H07.G08.E09.D10.B11.A12
137	Training	0	5500024024213121906558.B02	.H01.G02.E03.B05.A06	5500024030700072107991.B02	.H01.G02.E03.D04.B05.A06
138	Training	0	5500024030403071907252.C01	.H01.G02.E03.D04.B05.A06	5500024034290101707046.C01	.H01.G02.E03.D04.B05.A06
139	Training	0	'5500024035101021908499.E01	.H01.E03.D04.B05.A06	'5500024037498121108440.E07	.H07.G08.E09.D10.B11.A12
140	Training	0	5500024024214122006606.C04	.H01.G02.E03.D04.B05.A06	5500024031723100807773.C10	.H07.G08.E09.D10.B11.A12
141	Training	1	5500024035100021608459.C04	5500024035100021608459.C01	5500024035100021608459.C10	5500024035100021608459.C07
142	Training	1	5500024024214122006606.H09	.H07.G08.E09.D10.B11.A12	5500024024213121906561.H09	.H07.G08.E09.D10.B11.A12
143	Training	1	5500024034290101707045.D08	.H07.G08.E09.D10.B11.A12	5500024031330081907229.D08	.G08.E09.D10.B11.A12
144	Training	1	5500024031723100807770.F12	.H07.G08.E09.D10.B11.A12	610611110806.F06	.H01.G02.E03.D04.B05.A06
145	Training	0	5500024030402071707279.A05	.H01.G02.E03.D04.B05.A06	5500024031723100807776.A05	.H01.G02.E03.D04.B05.A06
146	Training	1	5500024034290101707050.H02	.H01.E03.D04.B05.A06	5500024031723100807771.H02	.H01.G02.E03.D04.B05.A06
147	Training	1	5500024024213121906562.F03	.H01.G02.E03.D04.B05.A06	5500024031723100807773.F03	.H01.G02.E03.D04.B05.A06
148	Training	1	5500024030403071907255.H12	.H07.G08.E09.D10.B11.A12	5500024031723100807775.H12	.H07.G08.E09.D10.B11.A12
149	Training	1	5500024032848101507997.F09	.G08.E09.D10.B11.A12	5500024035736031208613.F09	.H07.G08.E09.D10.B11.A12
150	Training	1	5500024030402071707279.D05	.H01.G02.E03.D04.B05.A06	5500024031723100807776.D05	.H01.G02.E03.D04.B05.A06
151	Training	1	5500024030403071907257.F11	.H07.G08.E09.D10.B11.A12	5500024030700072107992.F11	.H07.G08.D10.B11.A12
152	Training	0	5500024032848101507997.F11	.G08.E09.D10.B11.A12	5500024035736031208613.F11	.H07.G08.E09.D10.B11.A12
153	Training	0	5500024024214122006606.G12	.H07.G08.E09.D10.B11.A12	5500024024213121906561.G12	.H07.G08.E09.D10.B11.A12
154	Training	1	5500024031330081907228.F02	.H01.G02.E03.D04.B05.A06	5500024030760072207026.F02	.H01.G02.E03.D04.A06
155	Training	1	5500024035735011708571.C10	.H07.G08.E09.D10.B11.A12	5500024034290101707046.C10	.H07.G08.E09.D10.B11.A12
156	Training	1	5500024028849050407172.F11	.H07.G08.E09.D10.B11.A12	5500024034290101707044.F11	.H07.G08.E09.D10.B11.A12
157	Training	0	'5500024030403071907256.E06	.H01.G02.E03.D04.B05.A06	'5500024030760072207026.E06	.H01.G02.E03.D04.A06
158	Training	1	5500024031723100807772.H05	.H01.G02.E03.D04.B05.A06	5500024030700072107986.H05	.H01.G02.E03.D04.B05.A06
159	Training	1	5500024024213121906562.C05	.H01.G02.E03.D04.B05.A06	5500024017802120306174.C11	.H07.G08.E09.D10.B11.A12
160	Training	0	5500024024213121906558.F05	.H01.G02.E03.B05.A06	5500024030700072107986.F05	.H01.G02.E03.D04.B05.A06
161	Training	1	5500024035735011708571.G07	.H07.G08.E09.D10.B11.A12	5500024034290101707046.G07	.H07.G08.E09.D10.B11.A12
162	Training	0	5500024031330081907228.B06	.H01.G02.E03.D04.B05.A06	5500024030760072207026.B06	.H01.G02.E03.D04.A06
163	Training	0	5500024030403071907257.H11	.H07.G08.E09.D10.B11.A12	5500024030700072107992.H11	.H07.G08.D10.B11.A12
164	Training	1	'5500024030403071907253.E04	.H01.G02.E03.D04.B05.A06	5500024031723100807773.H06	.H01.G02.E03.D04.B05.A06
165	Training	1	'5500024024214122006606.E02	.H01.G02.E03.D04.B05.A06	'5500024024213121906561.E02	.H01.G02.E03.D04.B05.A06
166	Training	0	5500024030700072107994.B03	.H01.E03.D04.B05.A06	5500024034290101707044.B03	.H01.G02.E03.D04.B05.A06
167	Training	1	5500024035736031208618.B09	.H07.G08.E09.D10.B11.A12	5500024034290101707046.B09	.H07.G08.E09.D10.B11.A12
168	Training	1	5500024024213121906562.D11	.H07.G08.E09.D10.B11.A12	5500024024213121906564.D05	.H01.G02.E03.D04.B05.A06
169	Training	1	5500024024214122006606.H05	.H01.G02.E03.D04.B05.A06	5500024024213121906561.H05	.H01.G02.E03.D04.B05.A06
170	Training	0	5500024035736031208618.C08	.H07.G08.E09.D10.B11.A12	5500024034290101707044.C02	.H01.G02.E03.D04.B05.A06
171	Training	1	5500024035735011708571.A05	.H01.G02.E03.D04.B05.A06	5500024034290101707046.A05	.H01.G02.E03.D04.B05.A06
172	Training	1	5500024030403071907253.B07	.H07.G08.E09.D10.B11.A12	5500024031723100807771.B07	.H07.G08.E09.D10.B11.A12
173	Training	1	5500024035735011708571.B03	.H01.G02.E03.D04.B05.A06	5500024024213121906561.B03	.H01.G02.E03.D04.B05.A06
174	Training	1	5500024024214122006606.G10	.H07.G08.E09.D10.B11.A12	5500024024213121906561.G10	.H07.G08.E09.D10.B11.A12
175	Training	0	5500024030403071907256.H05	.H01.G02.E03.D04.B05.A06	5500024030760072207026.H11	.H07.G08.E09.D10.B11.A12
176	Training	1	5500024024213121906562.C02	.H01.G02.E03.D04.B05.A06	5500024017802120306174.C08	.H07.G08.E09.D10.B11.A12
177	Training	1	5500024030403071907257.F09	.H07.G08.E09.D10.B11.A12	5500024030700072107992.F09	.H07.G08.D10.B11.A12
178	Training	1	5500024031723100807770.C02	.H01.G02.D04.B05.A06	5500024031723100807769.C02	.H01.G02.E03.D04.B05.A06
179	Training	1	'5500024030700072107988.E06	.H01.G02.E03.D04.B05.A06	'5500024030700072107992.E06	.H01.E03.D04.B05.A06
180	Training	1	5500024030403071907257.C07	.H07.G08.E09.D10.B11.A12	5500024030700072107992.C07	.H07.G08.D10.B11.A12
181	Training	0	5500024024214122006606.A03	.H01.G02.E03.D04.B05.A06	5500024024213121906561.A03	.H01.G02.E03.D04.B05.A06
182	Training	1	5500024024214122006606.F10	.H07.G08.E09.D10.B11.A12	5500024024213121906561.F10	.H07.G08.E09.D10.B11.A12
183	Training	1	5500024024213121906562.C09	.H07.G08.E09.D10.B11.A12	5500024024213121906564.C03	.H01.G02.E03.D04.B05.A06
184	Training	0	5500024030403071907257.B01	.G02.E03.D04.B05.A06	5500024030700072107992.B01	.H01.E03.D04.B05.A06
185	Training	0	5500024051859013109328.G01	.H01.G02.E03.D04.B05.A06	5500024037498121108438.G01	.H01.G02.E03.D04.B05.A06
186	Training	1	'5500024035736031208617.E03	'5500024035736031208617.E01	5500024035736031208617.B08	5500024035736031208617.B07
187	Training	1	5500024031723100807770.A08	.H07.G08.E09.D10.B11.A12	5500024031723100807769.A08	.H07.G08.E09.D10.B11.A12
188	Training	1	5500024032848101507997.H06	.H01.E03.D04.B05.A06	610611110806.H12	.H07.G08.E09.D10.B11.A12
189	Training	0	'5500024030403071907253.E02	.H01.G02.E03.D04.B05.A06	'5500024017802120306174.E08	.H07.G08.E09.D10.B11.A12
190	Training	1	5500024030402071707279.G12	.H07.G08.E09.D10.B11.A12	5500024031723100807776.G12	.H07.G08.E09.D10.B11.A12
1	Validation		5500024024214122006606.C11	.H07.G08.E09.D10.B11.A12	5500024024213121906561.C11	.H07.G08.E09.D10.B11.A12
2	Validation		'5500024024213121906562.E08	.H07.G08.E09.D10.B11.A12	'5500024024213121906564.E02	.H01.G02.E03.D04.B05.A06
3	Validation		5500024030700072107994.H08	.H07.G08.E09.D10.B11.A12	5500024031723100807771.H08	.H07.G08.E09.D10.B11.A12
4	Validation		5500024032848101507997.D06	.H01.E03.D04.B05.A06	5500024035736031208613.D06	.H01.E03.D04.B05.A06
5	Validation		5500024028849050407169.F03	.H01.G02.E03.D04.B05.A06	5500024030700072107991.F03	.H01.G02.E03.D04.B05.A06
6	Validation		5500024028849050407172.B04	.H01.G02.E03.D04.B05.A06	5500024031330081907229.B10	.G08.E09.D10.B11.A12
7	Validation		5500024030402071707277.C05	.G02.E03.D04.B05.A06	5500024030700072107992.C05	.H01.E03.D04.B05.A06
8	Validation		5500024031723100807770.D12	.H07.G08.E09.D10.B11.A12	5500024031723100807769.D12	.H07.G08.E09.D10.B11.A12
9	Validation		5500024030403071907255.G06	.H01.E03.D04.B05.A06	5500024031723100807775.G06	.H01.G02.E03.D04.B05.A06
10	Validation		'5500024030402071707277.E04	.G02.E03.D04.B05.A06	'5500024030700072107992.E10	.H07.G08.D10.B11.A12
11	Validation		5500024028849050407172.A08	.H07.G08.E09.D10.B11.A12	5500024034290101707046.A02	.H01.G02.E03.D04.B05.A06
12	Validation		5500024032848101507997.A05	.H01.E03.D04.B05.A06	5500024035736031208613.A05	.H01.E03.D04.B05.A06
13	Validation		5500024024214122006606.C01	.H01.G02.E03.D04.B05.A06	5500024024213121906561.C01	.H01.G02.E03.D04.B05.A06
14	Validation		5500024034290101707045.F02	.H01.G02.E03.D04.B05.A06	5500024031330081907229.F02	.H01.E03.D04.B05.A06
15	Validation		5500024030700072107988.G03	.H01.G02.E03.D04.B05.A06	5500024030760072207026.G09	.H07.G08.E09.D10.B11.A12
16	Validation		5500024030760072207031.D11	.H07.G08.E09.D10.B11.A12	5500024030700072107991.D11	.H07.G08.E09.D10.B11.A12
17	Validation		5500024030700072107994.B09	.H07.G08.E09.D10.B11.A12	5500024031723100807771.B03	.H01.G02.E03.D04.B05.A06
18	Validation		5500024032848101507997.G05	.H01.E03.D04.B05.A06	5500024035736031208613.G05	.H01.E03.D04.B05.A06
19	Validation		5500024024214122006606.F09	.H07.G08.E09.D10.B11.A12	5500024024213121906561.F09	.H07.G08.E09.D10.B11.A12
20	Validation		'5500024030402071707279.E02	.H01.G02.E03.D04.B05.A06	'5500024031723100807776.E02	.H01.G02.E03.D04.B05.A06
21	Validation		5500024024214122006606.A09	.H07.G08.E09.D10.B11.A12	5500024024213121906561.A09	.H07.G08.E09.D10.B11.A12
22	Validation		5500024030402071707277.F01	.G02.E03.D04.B05.A06	5500024031723100807769.F07	.H07.G08.E09.D10.B11.A12
23	Validation		5500024024213121906558.A04	.H01.G02.E03.B05.A06	5500024030700072107991.A04	.H01.G02.E03.D04.B05.A06
24	Validation		5500024024213121906562.B12	.H07.G08.E09.D10.B11.A12	5500024024213121906564.B06	.H01.G02.E03.D04.B05.A06
25	Validation		5500024028849050407169.F05	.H01.G02.E03.D04.B05.A06	5500024030700072107991.F05	.H01.G02.E03.D04.B05.A06
26	Validation		5500024024214122006606.G03	.H01.G02.E03.D04.B05.A06	5500024034290101707046.G03	.H01.G02.E03.D04.B05.A06
27	Validation		5500024051859013109328.C01	.H01.G02.E03.D04.B05.A06	5500024037498121108438.C01	.H01.G02.E03.D04.B05.A06
28	Validation		'5500024024211121606513.E04	.H01.G02.E03.D04.B05.A06	'5500024030700072107992.E04	.H01.E03.D04.B05.A06
29	Validation		5500024030403071907255.D11	.H07.G08.E09.D10.B11.A12	5500024031723100807775.D11	.H07.G08.E09.D10.B11.A12
30	Validation		5500024030402071707279.F03	.H01.G02.E03.D04.B05.A06	5500024031723100807776.F03	.H01.G02.E03.D04.B05.A06
31	Validation		5500024030403071907251.A09	.H07.G08.E09.D10.B11.A12	5500024030700072107986.A09	.H07.G08.E09.D10.B11.A12
32	Validation		5500024030402071707279.G05	.H01.G02.E03.D04.B05.A06	5500024031723100807776.G05	.H01.G02.E03.D04.B05.A06
33	Validation		5500024030403071907255.C02	.H01.E03.D04.B05.A06	5500024031723100807775.C02	.H01.G02.E03.D04.B05.A06
34	Validation		5500024031723100807770.C03	.H01.G02.D04.B05.A06	5500024031723100807769.C03	.H01.G02.E03.D04.B05.A06
35	Validation		5500024030700072107994.G05	.H01.E03.D04.B05.A06	5500024034290101707046.G05	.H01.G02.E03.D04.B05.A06
36	Validation		'5500024030403071907251.E11	.H07.G08.E09.D10.B11.A12	'5500024030700072107986.E11	.H07.G08.E09.D10.B11.A12
37	Validation		'5500024030403071907255.E11	.H07.G08.E09.D10.B11.A12	'5500024031723100807775.E11	.H07.G08.E09.D10.B11.A12
38	Validation		5500024030402071707279.H10	.H07.G08.E09.D10.B11.A12	5500024031723100807776.H10	.H07.G08.E09.D10.B11.A12
39	Validation		5500024032848101507997.D11	.G08.E09.D10.B11.A12	5500024035736031208613.D11	.H07.G08.E09.D10.B11.A12
40	Validation		5500024024214122006606.H06	.H01.G02.E03.D04.B05.A06	5500024024213121906561.H06	.H01.G02.E03.D04.B05.A06
41	Validation		5500024028416032807794.D08	.H07.G08.E09.D10.B11	5500024031723100807771.D02	.H01.G02.E03.D04.B05.A06
42	Validation		5500024037496121008324.G07	.H07.G08.E09.D10.B11.A12	5500024037498121108438.G07	.H07.G08.E09.D10.B11.A12
43	Validation		5500024037498121108437.A07	.H07.G08.E09.D10.B11.A12	5500024034290101707044.A07	.H07.G08.E09.D10.B11.A12
44	Validation		5500024031723100807772.H11	.H07.G08.E09.D10.B11.A12	5500024030402071707280.H05	.H01.G02.E03.B05.A06
45	Validation		5500024030403071907255.H03	.H01.E03.D04.B05.A06	5500024031723100807775.H03	.H01.G02.E03.D04.B05.A06
46	Validation		5500024028849050407172.C05	.H01.G02.E03.D04.B05.A06	5500024031330081907229.C05	.H01.E03.D04.B05.A06
47	Validation		5500024030403071907255.B01	.H01.E03.D04.B05.A06	5500024031723100807775.B01	.H01.G02.E03.D04.B05.A06
48	Validation		5500024024213121906562.C11	.H07.G08.E09.D10.B11.A12	5500024024213121906564.C05	.H01.G02.E03.D04.B05.A06
49	Validation		5500024028849050407172.A11	.H07.G08.E09.D10.B11.A12	5500024034290101707044.A11	.H07.G08.E09.D10.B11.A12
50	Validation		5500024024213121906562.D12	.H07.G08.E09.D10.B11.A12	5500024024213121906564.D06	.H01.G02.E03.D04.B05.A06
51	Validation		5500024032848101507997.B06	.H01.E03.D04.B05.A06	5500024035736031208613.B06	.H01.E03.D04.B05.A06
52	Validation		5500024035101021908499.D01	.H01.E03.D04.B05.A06	5500024037498121108440.D07	.H07.G08.E09.D10.B11.A12
53	Validation		5500024030700072107994.D03	.H01.E03.D04.B05.A06	5500024034290101707044.D03	.H01.G02.E03.D04.B05.A06
54	Validation		5500024030402071707279.C12	.H07.G08.E09.D10.B11.A12	5500024031723100807776.C12	.H07.G08.E09.D10.B11.A12
55	Validation		5500024030403071907257.H02	.G02.E03.D04.B05.A06	5500024030700072107992.H02	.H01.E03.D04.B05.A06
56	Validation		5500024037496121008324.A03	.H01.G02.E03.D04.B05.A06	5500024031723100807776.A09	.H07.G08.E09.D10.B11.A12
57	Validation		5500024031723100807772.F02	.H01.G02.E03.D04.B05.A06	5500024037498121108442.F08	.H07.G08.D10.B11.A12
58	Validation		5500024032848101507997.D03	.H01.E03.D04.B05.A06	5500024035736031208613.D03	.H01.E03.D04.B05.A06
59	Validation		5500024035735011708567.H04	.H01.G02.E03.D04.B05.A06	5500024037498121108438.H10	.H07.G08.E09.D10.B11.A12
60	Validation		'5500024051859013109328.E06	.H01.G02.E03.D04.B05.A06	'5500024037498121108438.E12	.H07.G08.E09.D10.B11.A12
61	Validation		5500024031723100807772.F01	.H01.G02.E03.D04.B05.A06	5500024030700072107986.F01	.H01.G02.E03.D04.B05.A06
62	Validation		5500024030403071907255.G01	.H01.E03.D04.B05.A06	5500024031723100807775.G01	.H01.G02.E03.D04.B05.A06
63	Validation		5500024035735011708571.B07	.H07.G08.E09.D10.B11.A12	5500024034290101707046.B07	.H07.G08.E09.D10.B11.A12
64	Validation		5500024035736031208617.F05	5500024035736031208617.F01	5500024035736031208617.C09	5500024035736031208617.C07
65	Validation		5500024024213121906558.C01	.H01.G02.E03.B05.A06	5500024030700072107991.F11	.H07.G08.E09.D10.B11.A12
66	Validation		5500024030760072207031.B10	.H07.G08.E09.D10.B11.A12	5500024030700072107991.B10	.H07.G08.E09.D10.B11.A12
67	Validation		5500024030403071907253.D12	.H07.G08.E09.D10.B11.A12	5500024031723100807771.D12	.H07.G08.E09.D10.B11.A12
68	Validation		5500024034290101707045.A03	.H01.G02.E03.D04.B05.A06	5500024031330081907229.A03	.H01.E03.D04.B05.A06
69	Validation		5500024030402071707277.A02	.G02.E03.D04.B05.A06	5500024030760072207026.A08	.H07.G08.E09.D10.B11.A12
70	Validation		5500024030403071907256.G05	.H01.G02.E03.D04.B05.A06	5500024030760072207026.G11	.H07.G08.E09.D10.B11.A12
71	Validation		5500024030402071707279.B04	.H01.G02.E03.D04.B05.A06	5500024031723100807776.B04	.H01.G02.E03.D04.B05.A06
72	Validation		'5500024030403071907255.E01	.H01.E03.D04.B05.A06	'5500024031723100807775.E01	.H01.G02.E03.D04.B05.A06
73	Validation		5500024037498121108437.G05	.H01.E03.D04.B05.A06	5500024034290101707044.G05	.H01.G02.E03.D04.B05.A06
74	Validation		5500024028849050407169.B12	.G08.E09.D10.B11.A12	5500024034290101707046.B06	.H01.G02.E03.D04.B05.A06
75	Validation		5500024035101021908499.C04	.H01.E03.D04.B05.A06	5500024037498121108440.C10	.H07.G08.E09.D10.B11.A12
76	Validation		5500024024214122006606.H08	.H07.G08.E09.D10.B11.A12	5500024024213121906561.H08	.H07.G08.E09.D10.B11.A12
77	Validation		'5500024035101021908499.E08	.H07.G08.E09.D10.B11.A12	'5500024031723100807773.E08	.H07.G08.E09.D10.B11.A12
78	Validation		5500024031723100807770.H06	.H01.G02.D04.B05.A06	5500024031723100807769.H06	.H01.G02.E03.D04.B05.A06
79	Validation		'5500024031330081907228.E11	.H07.G08.E09.D10.B11.A12	'5500024030760072207026.E11	.H07.G08.E09.D10.B11.A12
80	Validation		'5500024034290101707045.E11	.H07.G08.E09.D10.B11.A12	'5500024024213121906564.E05	.H01.G02.E03.D04.B05.A06
81	Validation		5500024032848101507997.D09	.G08.E09.D10.B11.A12	5500024035736031208613.D09	.H07.G08.E09.D10.B11.A12
82	Validation		5500024031330081907228.H02	.H01.G02.E03.D04.B05.A06	5500024030760072207026.H02	.H01.G02.E03.D04.A06
83	Validation		5500024031723100807772.F06	.H01.G02.E03.D04.B05.A06	5500024030700072107986.F06	.H01.G02.E03.D04.B05.A06
84	Validation		5500024024213121906562.C04	.H01.G02.E03.D04.B05.A06	5500024017802120306174.C10	.H07.G08.E09.D10.B11.A12
85	Validation		5500024024213121906562.G03	.H01.G02.E03.D04.B05.A06	5500024017802120306174.G09	.H07.G08.E09.D10.B11.A12
86	Validation		5500024053146032309538.H03	5500024053146032309538.H01	5500024053146032309538.H09	5500024053146032309538.H07
